# Supplementary material for: Selection of High Producers From Combinatorial Libraries for the Production of Recombinant Proteins in Escherichia coli and Vibrio natriegens
Source: PubMed Central journal article supplement (PMC6788121; doi:10.3389/fbioe.2019.00254), 2019-10-04
Supplement: Table_1.pdf [file Table_1.pdf]

# High producer selection from combinatorial libraries for recombinant protein and peptide production in *E. coli* and *V. natriegens*

1 Joel Eichmann<sup>1,2</sup>, Markus Oberpaul<sup>3</sup>, Tobias Weidner<sup>1</sup>, Doreen Gerlach<sup>3</sup>, Peter Czermak<sup>1,2,3\*</sup>

2 <sup>1</sup> Institute of Bioprocess Engineering and Pharmaceutical Technology, University of Applied  
3 Sciences Mittelhessen, Giessen, Germany

4 <sup>2</sup> Faculty of Biology and Chemistry, Justus-Liebig University of Giessen, Germany

5 <sup>3</sup> Branch for Bioresources, Fraunhofer Institute for Molecular Biology and Applied Ecology, Giessen,  
6 Germany

7

8 \* **Correspondence:**

9 Prof. Dr.-Ing. Peter Czermak

10 [peter.czermak@lse.thm.de](mailto:peter.czermak@lse.thm.de)

11

12

## 13 **Supplementary material**

### 14 **1 Sequences**

#### 15 **1.1 Synthetic RBS**

16 Supplemental Table 1: Sequences of synthetic RBS, designed using the RBS calculator (Salis et al.  
17 2009; Espah Borujeni et al. 2014). Underlined sequences indicate BsaI-overhangs for Golden Gate  
18 cloning.

---

| <b>RBS</b> | <b>Secretion signal</b> | <b>RBS sequence 5' - 3'</b>                    |
|------------|-------------------------|------------------------------------------------|
| RBS1       | ssNapA                  | <u>GGAGAGTCTACAATATAATATAAGGAGGTCAGG</u>       |
| RBS2       | ssTorA                  | <u>GGAGTTCACATACATAAACAATAGGGAGGACACAACAGG</u> |
| RBS3       | ssYahJ                  | <u>GGAGTAATAACCAAAACAAAAGAGGAGGTACCAACAGG</u>  |
| RBS4       | ssYcdB                  | <u>GGAGTATAATAAACAGTAGATAAGGAGGTAATAACAGG</u>  |
| RBS5       | ssDmsA                  | <u>GGAGCCTAGAGATTCTAAGATAAGGAGGTAATAACAGG</u>  |

---

19

20

## Supplemental Material

### 21 1.2 Secretion signals

22 Supplementals Table 2: Sequences of the secretion signals used for RBS design and periplasmic  
23 translocation. Underlined sequences indicate BsaI-overhangs for Golden Gate cloning.

| Secretion signal | Peptide sequence                                       | DNA sequence 5' – 3'                                                                                                                                                               |
|------------------|--------------------------------------------------------|------------------------------------------------------------------------------------------------------------------------------------------------------------------------------------|
| ssNapA           | MKLSRRSFMKANAVAA<br>AAAAAGLSVPGVARAV<br>VGQ            | <u>CAGGATGAAACTCAGTCGTCGTAGCTTTATGA</u><br>AAGCTAACGCCGTTGCGGCCGCTGCGGCGGCT<br>GCCGGTCTGAGCGTGCCGGGCGTTGCCCGCGC<br>CGTTGTTGGTCAG <u>AGTG</u>                                       |
| ssTorA           | MNNNDLFQASRRRFLA<br>QLGGLTVAGMLGPSLLT<br>PRRATAAQAATDA | <u>CAGGATGAACAATAACGATCTCTTTCAGGCAT</u><br>CACGTCGGCGTTTTCTGGCACAACCTCGGCGGC<br>TTAACCGTCGCCGGGATGCTGGGGCCGTCATT<br>GTTAACGCCGCGACGTGCGACTGCGGCGCAA<br>GCGGCGACTGACGCT <u>AGTG</u> |
| ssYahJ           | MKESNSRREFLSQSGKM<br>VTAAALFGTSVPLAHAA<br>VAGTL        | <u>CAGGATGAAAGAAAGCAATAGCCGCCGTGAA</u><br>TTTCTGAGCCAGAGCGGTAAGATGGTCACCGC<br>CGCCGCGCTGTTTGGTACCTCTGTGCCGCTCG<br>CCCATGCGGCCGCTAGCTGGCACCCCTA <u>AGTG</u>                         |
| ssYcdB           | MQYKDENGVNPSRRR<br>LLKVIGALALAGSCPVA<br>HAQKTQSA       | <u>CAGGATGCAGTATAAAGATGAAAACGGCGTG</u><br>AATGAACCGTCACGCCGACGTTTACTGAAAGT<br>GATAGGTGCACTGGCGCTGGCGGGAAGTTGTC<br>CGGTCGCTCATGCACAAAAACGCAAAGTGC<br>G <u>AGTG</u>                  |
| ssDmsA           | MKTKIPDAVLAAEVSRR<br>GLVKTTAIGGLAMASSA<br>LTLFSAHA     | <u>CAGGATGAAAACCAAATTCGGGATGCGGTG</u><br>CTGGCGGCGGAAGTGTCCCGTCGTGGCCTGGT<br>GAAAACCACCGCGATTGGCGGCCTGGCGATG<br>GCGTCCTCCGCGCTGACCCTGCCGTTTTCCCGT<br>ATTGCGCATGCG <u>AGTG</u>      |

24

25

26

27

28

29

## Supplemental Material

### 30 1.3 Plasmid sequences from identified high producers (expression cassette only)

31 Bold characters indicate the T7-promoter, underlined characters indicate the RBS.

32 > High-producer 1 (IMPI)

33 ;T7::RBS3\_ssDmsA-SUMO-GFP-Thr-IMPI\_T7ter

34 **TAATACGACTCACTATAGGGGAATTGTGAGCGGATAACAAT**CCCCCTCTAGAAATAAC  
35 TATTTACGGAGTAATAACCAAAACAAAAGAGGAGGTACCAACAGGATGAAAACCAAAA  
36 TTCCGGATGCGGTGCTGGCGGCGGAAGTGTCCCGTCGTGGCCTGGTGAAAACCCGCG  
37 ATTGGCGGCCTGGCGATGGCGTCCCTCCGCGCTGACCCTGCCGTTTTCCCGTATTGCGCAT  
38 GCGAGTGAAGGTTCTTCTATGGCTAGCATGTTCGACTCAGAAGTCAATCAAGAAGCTAA  
39 GCCAGAGGTCAAGCCAGAAGTCAAGCCTGAGACTCACATCAATTTAAAGGTGTCCGATG  
40 GATCTTCAGAGATCTTCTTCAAGATCAAAAAGACCACTCCTTTAAGAAGGCTGATGGAA  
41 GCGTTCGCTAAAAGACAGGGTAAGGAAATGGACTCCTTAAGATTCTTGTACGACGGTAT  
42 TAGAATTCAAGCTGATCAGACCCCTGAAGATTTGGACATGGAGGATAACGATATTATTG  
43 AGGCTCACAGAGAACAGATTGGTGGGATCGAGCTATCAGAGGAGAGCAAAGGCGAAGA  
44 ACTGTTTACGGGCGTCGTGCCGATTCTGGTGGAACTGGATGGCGATGTCAATGGTCATA  
45 AATTCAGCGTTAGCGGCGAAGGTGAAGGCGATGCGACCTATGGTAAACTGACGCTGAA  
46 ATTTATTTGCACCACGGGTAAACTGCCGGTGCCGTGGCCGACCCTGGTTACCACGCTGAC  
47 GTATGGTGTTCAGTGTTTCTCCCGCTACCCGGATCATATGAAACAACACGACTTTTTCAA  
48 ATCAGCGATGCCGGAAGGTTATGTCCAGGAACGTACCATTTTCTTTAAAGATGACGGCA  
49 ACTACAAAACCCGCGCCGAAGTCAAATTTGAAGGTGATACGCTGGTGAACCGTATTGAA  
50 CTGAAAGGCATCGATTTCAAAGAAGATGGTAATATCCTGGGCCATAAACTGGAATATAA  
51 CTACAATTCGCACAACGTTTACATTATGGCAGATAAACAGAAAAACGGTATCAAAGTCA  
52 ACTTCAAAATCCGCCATAATATCGAAGATGGCTCTGTGCAACTGGCTGACCACTATCAG  
53 CAAAACACCCCGATCGGTGATGGCCCGGTTCTGCTGCCGGACAATCATTACCTGAGCAC  
54 CCAGTCTGCACTGAGTAAAGATCCGAACGAAAAACGTGACCACATGGTCCTGCTGGAAT  
55 TTGTCACGGCGGCGGGTATCACGCTGGGTATGGATGAACTGTATAAAGAGCAAGGCGGC  
56 GGCAGCCTGGTGCCGCGCGGAAGTATTGTGCTGATTTGTAACGGTGGTCACGAATACTA  
57 CGAATGTGGCGGTGCTTGCGATAATGTCTGTGCTGATCTGCATATCCAAAACAAAACCA  
58 ACTGCCCGATCATCAACATCCGTTGTAACGATAAATGCTACTGTGAAGATGGCTACGCG  
59 CGCGACGTGAATGGTAAATGCATTCCGATCAAAGACTGTCCGAAAATCCGTAGCTAATG  
60 GGTAATTGATTAATACTAGGCTGCTAAACAAAGCCCGAAAGGAAGCTGAGTTGGCTGC  
61 TGCCACCGCTGAGCAATAACTAGCATAACCCCTTGGGGCCTCTAAACGGGTCTTGAGGG  
62 GTTTTTTG

63

64

65

66

67

68

69

## Supplemental Material

70 > High-producer 2 (Lucimycin)  
71 ;T7::RBS2\_ssYahJ-His-Trx-GFP-Thr-Lucimycin\_T7ter  
72 **TAATACGACTCACTATAGGGGAATTGTGAGCGGATAACAATCCCCTCTAGAAATAAC**  
73 **TATTTACGGAGTTCCATACATAAACAATAGGGAGGACACAACAGGATGAAAGAAAGCA**  
74 **ATAGCCGCCGTGAATTTCTGAGCCAGAGCGGTAAGATGGTCACCGCCGCCGCGCTGTTT**  
75 **GGTACCTCTGTGCCGCTCGCCCATGCGGCGGTAGCTGGCACCCCTAAGTGAACATCATCA**  
76 **CCATCACCACAGCGACAAAATTATCCACCTGACGGACGACAGTTTCGACACGGATGTTC**  
77 **TGAAAGCCGATGGCGCGATTCTGGTTGACTTCTGGGCGGAATGGTGCGGCCCGTGTA**  
78 **ATGATTGCACCGATCCTGGATGAAATTGCTGACGAATATCAGGGCAAACCTGACCGTGGC**  
79 **GAAACTGAACATCGATCAAATCCGGGTACCGCCCCGAAATACGGCATTCTGTGGTATCC**  
80 **CGACGCTGCTGCTGTTTAAAAACGGTGAAGTTGCGGCCACCAAAGTCGGTGCCCTGTCA**  
81 **AAAGGTCAACTGAAAGAATTCCTGGACGCAAATCTGGCGCTATCAGAGGAGAGCAAAG**  
82 **GCGAAGAAGTGTTCACGGGCGTTCGTGCCGATTCTGGTGGAACTGGATGGCGATGTCAAT**  
83 **GGTCATAAATTCAGCGTTAGCGGCGAAGGTGAAGGCGATGCGACCTATGGTAAACTGAC**  
84 **GCTGAAATTTATTTGCACCACGGGTAAACTGCCGGTGCCGTGGCCGACCCTGGTTACCA**  
85 **CGCTGACGTATGGTGTTTCAGTGTTTCTCCCGCTACCCGGATCATATGAAACAACACGACT**  
86 **TTTTCAAATCAGCGATGCCGGAAGGTTATGTCCAGGAACGTACCATTTTCTTTAAAGATG**  
87 **ACGGCAACTACAAAACCCGCGCCGAAGTCAAATTTGAAGGTGATACGCTGGTGAACCGT**  
88 **ATTGAACTGAAAGGCATCGATTTCAAAGAAGATGGTAATATCCTGGGCCATAAACTGGA**  
89 **ATATAACTACAATTCGCACAACGTTTACATTATGGCAGATAAACAGAAAAACGGTATCA**  
90 **AAGTCAACTTCAAATCCGCCATAATATCGAAGATGGCTCTGTGCAACTGGCTGACCAC**  
91 **TATCAGCAAAACACCCCGATCGGTGATGGCCCGGTTCTGCTGCCGGACAATCATTACCT**  
92 **GAGCACCCAGTCTGCACTGAGTAAAGATCCGAACGAAAAACGTGACCACATGGTCCTGC**  
93 **TGGAATTTGTCACGGCGGCGGGTATCACGCTGGGTATGGATGAACTGTATAAAGAGCAA**  
94 **GGCGGCGGCAGCCTGGTGCCGCGCGGAAGTCAGCACGGTTACGGCGCAGGTGGTCACG**  
95 **GTCAGCAGGGTTACGGCTCGCAACACTCGTCGCACGCTCCGCAAGGCGGTCACGTCGTC**  
96 **CGTGAACAGGGTTTTAGTGGCCACGTGCATGAACAGCAAGCGGGTCATCACCATGAAGC**  
97 **CGGCCACCATGAACAGGCGGGTACCATGAACAAAGCGGCCAGCAAGTTCACGGCCAG**  
98 **GGTCATGGCTATAAATCTCACGGTTACTAATGGGTAATTGATTAATACCTAGGCTGCTAA**  
99 **ACAAAGCCCGAAAGGAAGCTGAGTTGGCTGCTGCCACCGCTGAGCAATAACTAGCATA**  
100 **ACCCCTTGGGGCCTCTAAACGGGTCTTGAGGGGTTTTTTG**

101

102

103

104

105

106

107

108

109

## Supplemental Material

110 > High-producer 3 (Uricase)

111 ;T7::RBS5\_ssYahJ-His-Trx-GFP-Thr-Uricase\_T7ter

112 **TAATACGACTCACTATAGGGGAATTGTGAGCGGATAACAATCCCCTCTAGAAATAAC**  
113 **TATTTACGGAGCCTAGAGATTCTAAGATAAGGAGGTAAATACAGGATGAAAGAAAGCA**  
114 ATAGCCGCCGTGAATTTCTGAGCCAGAGCGGTAAGATGGTCACCGCCGCCGCGCTGTTT  
115 GGTACCTCTGTGCCGCTCGCCCATGCGGCGGTAGCTGGCACCCCTAAGTGAACATCATCA  
116 CCATCACCACAGCGACAAAATTATCCACCTGACGGACGACAGTTTCGACACGGATGTTC  
117 TGAAAGCCGATGGCGCGATTCTGGTTGACTTCTGGGCGGAATGGTGCGGCCCGTGTAAA  
118 ATGATTGCACCGATCCTGGATGAAATTGCTGACGAATATCAGGGCAAACCTGACCGTGGC  
119 GAAACTGAACATCGATCAAAATCCGGGTACCGCCCCGAAATACGGCATTCTGTGGTATCC  
120 CGACGCTGCTGCTGTTTAAAAACGGTGAAGTTGCGGCCACCAAAGTCGGTGCCCTGTCA  
121 AAAGGTCAACTGAAAGAATTCCTGGACGCAAATCTGGCGCTATCAGAGGAGAGCAAAG  
122 GCGAAGAAGTGTTCACGGGCGTTCGTGCCGATTCTGGTGGAACTGGATGGCGATGTCAAT  
123 GGTCAATAATTCAGCGTTAGCGGCGAAGGTGAAGGCGATGCGACCTATGGTAAACTGAC  
124 GCTGAAATTTATTTGCACCACGGGTAAACTGCCGGTGCCGTGGCCGACCCTGGTTACCA  
125 CGCTGACGTATGGTGTTTCAGTGTTTCTCCCGCTACCCGGATCATATGAAACAACACGACT  
126 TTTTCAAATCAGCGATGCCGGAAGGTTATGTCCAGGAACGTACCATTTTCTTTAAAGATG  
127 ACGGCAACTACAAAACCCGCGCCGAAGTCAAATTTGAAGGTGATACGCTGGTGAACCGT  
128 ATTGAACTGAAAGGCATCGATTTCAAAGAAGATGGTAATATCCTGGGCCATAAACTGGA  
129 ATATAACTACAATTCGCACAACGTTTACATTATGGCAGATAAACAGAAAAACGGTATCA  
130 AAGTCAACTTCAAATCCGCCATAATATCGAAGATGGCTCTGTGCAACTGGCTGACCAC  
131 TATCAGCAAAACACCCCGATCGGTGATGGCCCGGTTCTGCTGCCGGACAATCATTACCT  
132 GAGCACCCAGTCTGCACTGAGTAAAGATCCGAACGAAAAACGTGACCACATGGTCCTGC  
133 TGGAATTTGTCACGGCGGGCGGGTATCACGCTGGGTATGGATGAACTGTATAAAGAGCAA  
134 GGCGGCGGCAGCCTGGTGCCGCGCGGAAGTTTTGCTCGTCCCTTGCAGCGTCCTAGTGG  
135 AAAGGGGACACCGCAGCAAGATCGCGAAGCCCTCATCAGTACACGATCTCCGATCATG  
136 GGTATGGCAAAGACAGTGTTAAAGTCCTGCATGTTAAACGCGATGGCCAGTACACTCG  
137 ATCAAAGAGTTTGAGGTAGGCACCCATCTGAAACTCTACTCCAAGAAAGACTACTTTCA  
138 TGGCGACAATAGCGATATCGTGGCGACTGACAGCCAGAAAAATACCGTATATCTGCTCG  
139 CGAAGAAATTTGGCATTGAGAATCCAGAGAAATTTGGGCTTATTCTTGCATCGCACTTCC  
140 TGAACAAATATGCGCATGTGGAAGAAGTGCACATTCACGTGGAAGAATATCCCTGGCAA  
141 CGGATTTGCCAGGATCAAGTTGGTGGTACAACCGGCGCATGTGGTGTGCTCCGAACTT  
142 CAGTACGTTCAATAATCGCCAGAAACACAACCATGCCTTCATTTTACCCCTACGGAAGT  
143 TCGCTATTGCGATGTGGTGTACGTCGTACTIONGAAACAGACCGTAATTAGCGGTA  
144 TTCGTGGACTGCGGGTTCTGAAAACGACGCAAAGTAGCTTCGTGAACTTTGTGAACGAC  
145 GAATTTTCGCTCTCTGCCGGATCAGTATGACCGCATTCTTCAACCATCGTCGATTGCTCTT  
146 GGAATACTCACGCACCAATAATGTCAAATTCGTCAGGACTGGAATACGGTGAAGAAC  
147 ATCATCATCAAGAAATTCGCGGGTGTCCGAATGTTGGCACTTCAAGCCCGTCGGTGCA  
148 ACATACTCTGTATCTGACCGAGAAAGAAGTCTTAGATGCCTTGCCAGAAGTATCCGTGA  
149 TTAGCATGACCATGCCGAACAAACACTACTTTAACTTTGACACAAAACCGTTTCAGTCG  
150 GTTGTTCAGGTGAAAACAACGAGGTGTTTATCCCGGTCGATAAACCGCATGGCACCAT  
151 TTACGCACAACCTGGCGCGCAAGGATCTGGCCTCTCACTTATAATGGGTAATTGATTAATA  
152 CCTAGGCTGCTAAACAAAGCCCGAAAGGAAGCTGAGTTGGCTGCTGCCACCGCTGAGCA  
153 ATAACTAGCATAACCCCTTGGGGCCTCTAAACGGGTCTTGAGGGGTTTTTTG

154

155

**Supplemental Material**

156 **2 High Producers**

157 SDS-PAGE and / or Western Blot of top candidates shown in Table 1.

158 **2.1 IMPI**

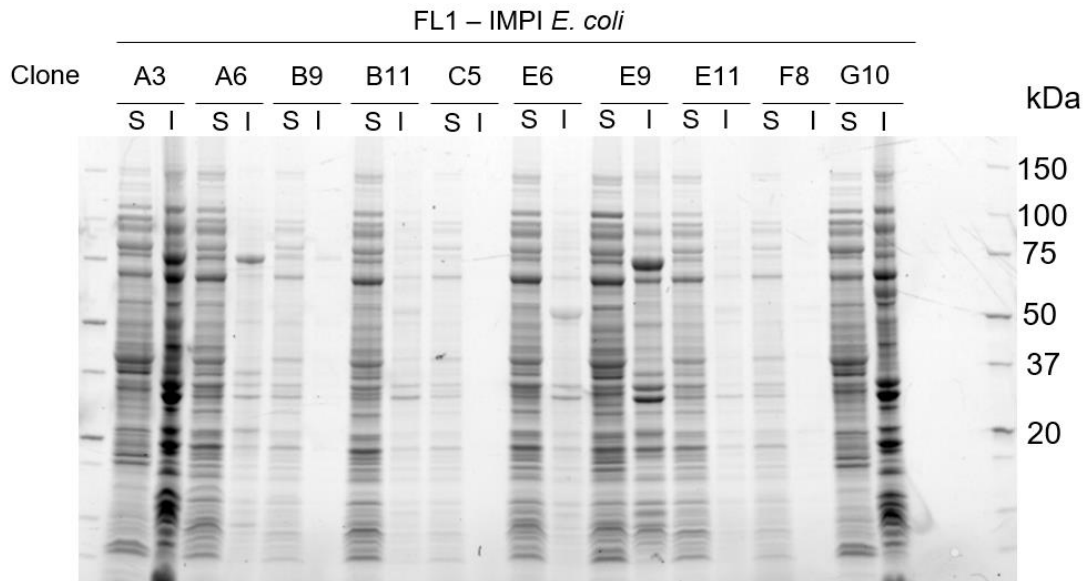

159

160 Supplementary Figure 1: SDS-PAGE of ten top candidates for IMPI production in *E. coli*. Standard:  
 161 Precision Plus Protein™ Unstained Protein Standard. S: soluble protein fraction; I: insoluble protein  
 162 fraction.

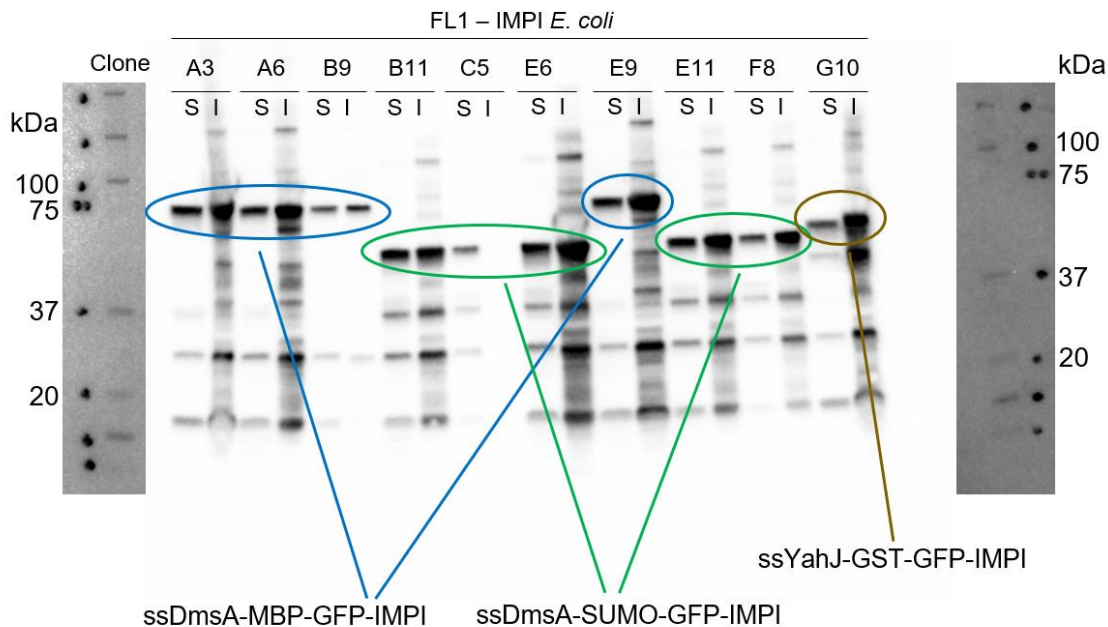

163

164 Supplementary Figure 2: Western Blot of ten top candidates for IMPI production in *E. coli*.  
 165 S: soluble protein fraction; I: insoluble protein fraction. Circles indicate the expected Bands  
 166 according to sequencing of the expression plasmids. Primary antibody: Anti-GFP 3H9 (Chromotek),  
 167 secondary antibody: Anti-Rat-HRP (Jackson Immuno).

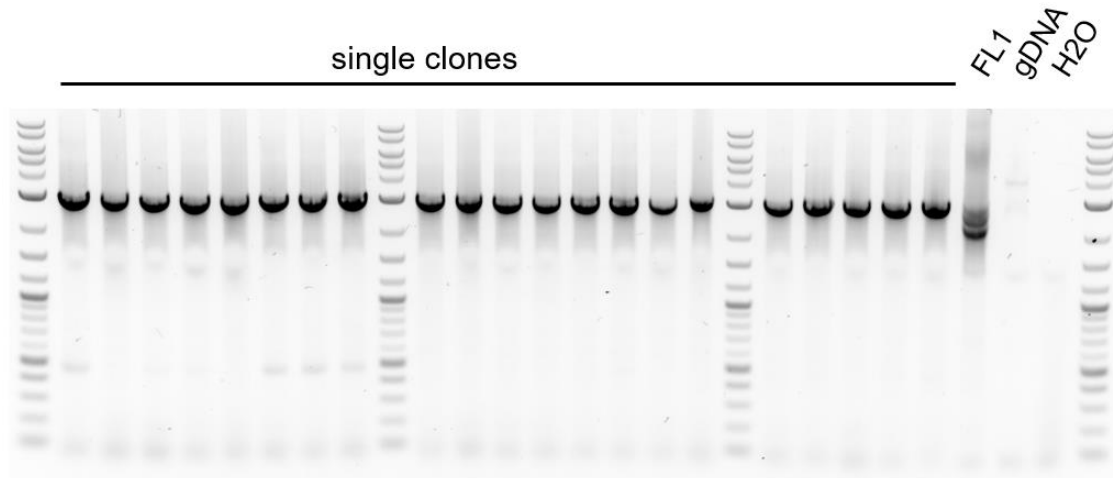

168  
169 Supplementary Figure 3: Colony PCR of selected clones for IMPI production in *V. natriegens*.  
170 Controls: Combinatorial expression library FL1, genomic *V. natriegens* DNA, water. Sanger  
171 sequencing of the PCR products revealed all clones to carry the same expression plasmid:  
172 RBS2\_ssYahJ-MBP-GFP-IMPI. Production resulted in insoluble product.

173

174 **2.2 Lucimycin**

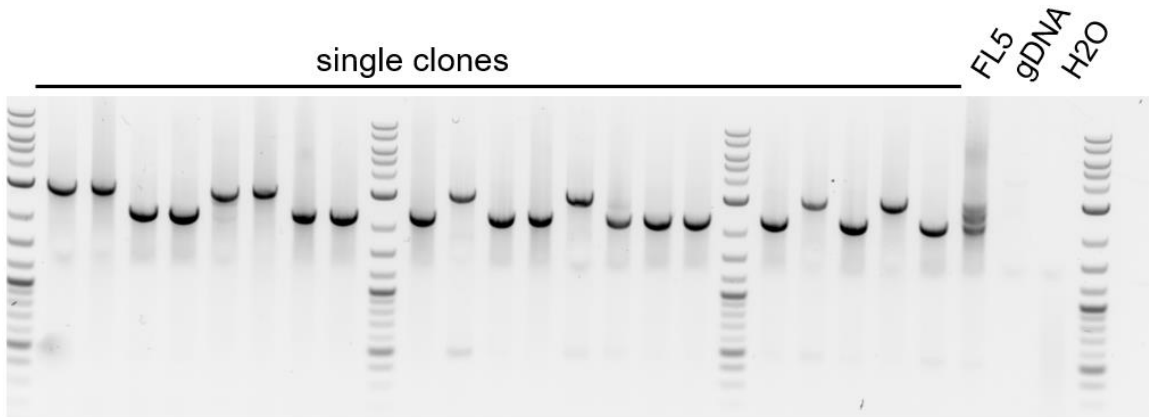

175  
176 Supplementary Figure 4: Colony PCR of selected clones for Lucimycin production in *V. natriegens*.  
177 Controls: Combinatorial expression library FL5, genomic *V. natriegens* DNA, water. Sanger  
178 sequencing of the PCR products revealed two expression plasmids: RBS2\_ssDmsA-MBP-GFP-  
179 Lucimycin (upper bands) and RBS2\_YahJ-His<sub>6</sub>-Trx-GFP-Lucimycin (lower bands).

180

181

182

183

184





## Supplemental Material

### 200 3 Cropped images

#### 201 3.1 Western Blots

202 Multiple cropped images of Western Blots are shown in the main article. Here, the full images are  
203 shown.

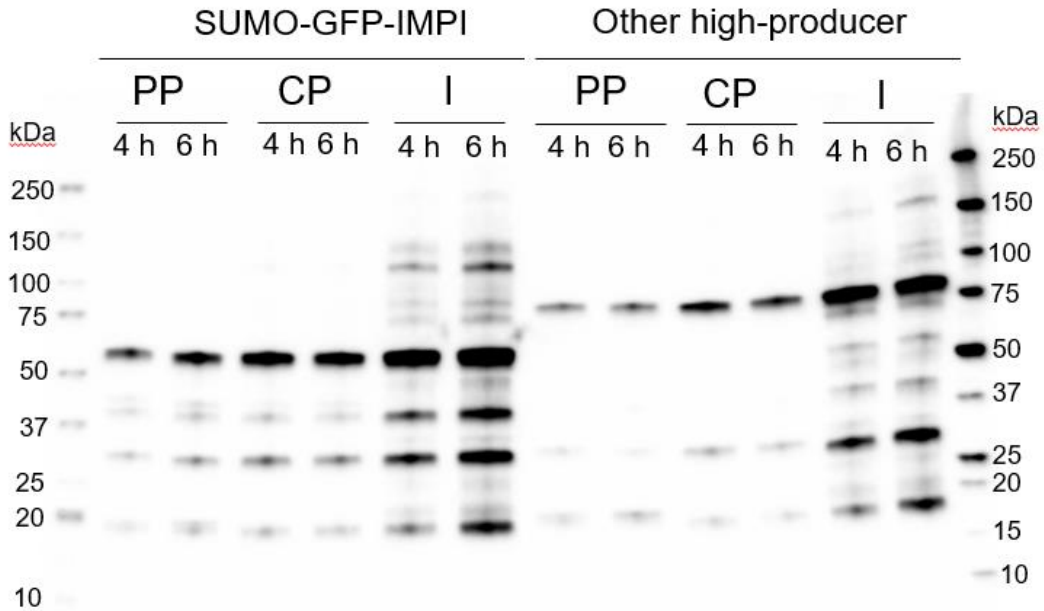

204

205 Supplementary Figure 7: Full Western Blot of high-producer SUMO-GFP-IMPI (left). Fig. 5 in the  
206 main article shows a cropped version of this image. Another high-producer not discussed in the main  
207 article is shown on the right side of the blot. PP: Periplasmic fraction; CP: Cytoplasmic fraction; I:  
208 Insoluble and membrane fraction. Standards left: Precision Plus Protein™ Western C Blotting  
209 Standard (BioRad); standard right: Precision Plus Protein™ Unstained Protein Standard, Strep-  
210 tagged (BioRad). Expected bands : left, SUMO-GFP-IMPI: 52,7 kDa; right, other high-producer:  
211 77,2 kDa.

212

213

**Supplemental Material**

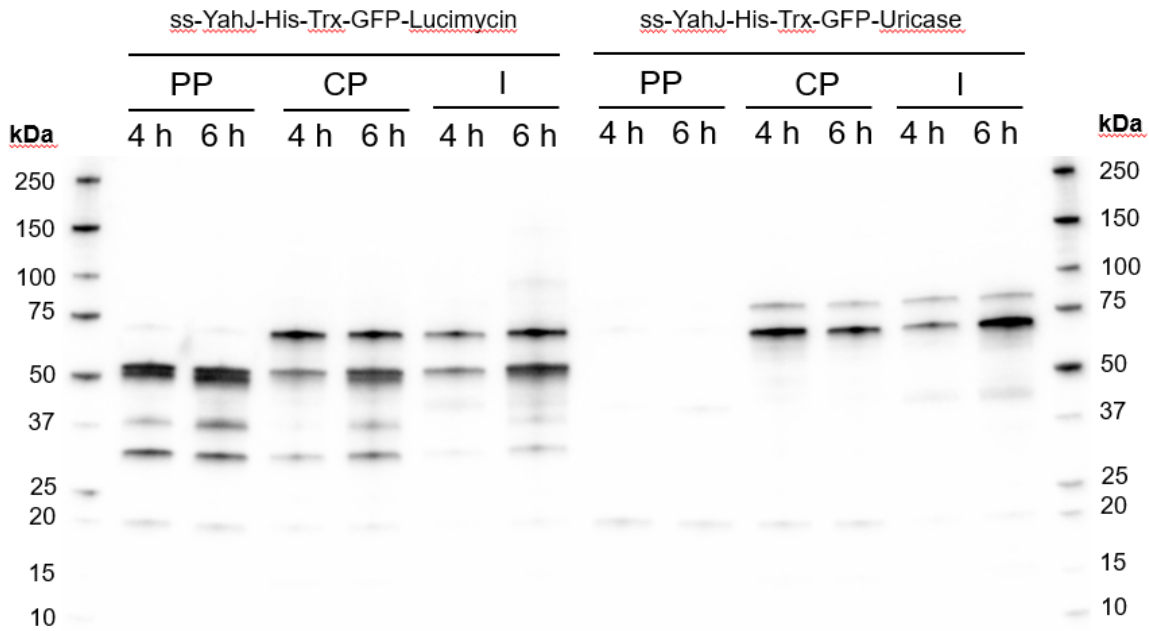

214

215 Supplementary Figure 8: Full Western Blot of high-producer ssYahJ-His-Trx-GFP fusion of  
216 Lucimycin (left) and Uricase (right). The left site of this blot is partially shown in in Fig. 6 of the  
217 main manuscript. PP: Periplasmic fraction; CP: Cytoplasmic fraction; I: Insoluble and membrane  
218 fraction. Standards left: Precision Plus Protein™ Western C Blotting Standard (BioRad); standard  
219 right: Precision Plus Protein™ Unstained Protein Standard, Strep-tagged (BioRad). Expected bands:  
220 left, ssYahJ-His-Trx-GFP-Lucimycin: 53,2 kDa; right, ssYahJ-His-Trx-GFP-Uricase: 83,2 kDa.

221

222

223

224

225

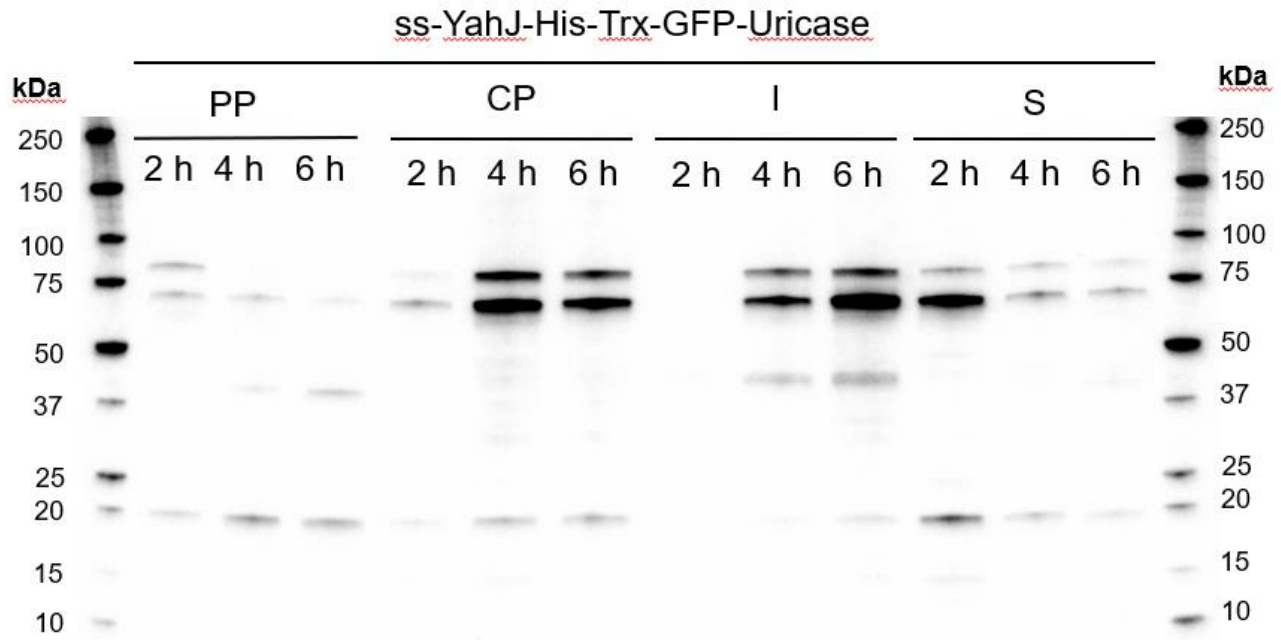

226

227 Supplementary Figure 9: Full Western Blot of high-producer ssYahJ-His-Trx-GFP-Uricase at all  
228 analysed time points. This blot is partially shown in in Fig. 7 of the main manuscript. PP: Periplasmic  
229 fraction; CP: Cytoplasmic fraction; I: Insoluble and membrane fraction; S: full soluble protein after  
230 BugBuster® extraction (diluted). Standards: Precision Plus Protein™ Unstained Protein Standard,  
231 Strep-tagged (BioRad). Expected bands: ssYahJ-His-Trx-GFP-Uricase: 83,2 kDa.

232

233

234

235

236

237

238

239

240

241

242

243

244

245 **3.2 Agarose gels**

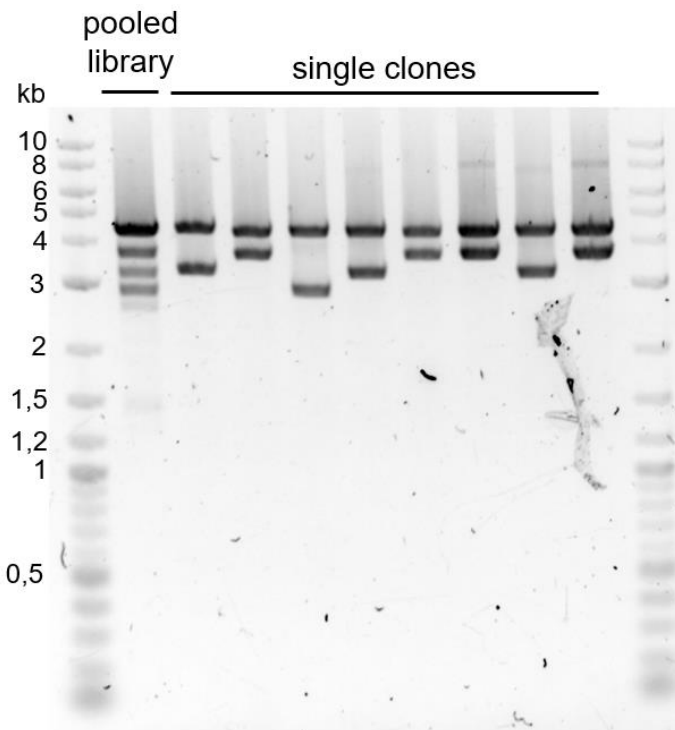

246

247 Supplementary Figure 10: BsaI-digestion of combinatorial expression library and single clones  
 248 isolated from the library. The upper band represents the plasmid backbone and is expected at  
 249 4302 bp. The lower bands represent the inserts. Due to the size difference of the fusion tags for  
 250 purification, the inserts differ in size. All sizes are present in the library, while single clones carry  
 251 only one of the possible inserts. Marker: 2-Log DNA Ladder (NEB). A cropped version of this image  
 252 is found in the main article in Fig. 1 B.

253

254

255 **Literature**

256 Espah Borujeni, Amin; Channarasappa, Anirudh S.; Salis, Howard M. (2014): Translation rate is  
 257 controlled by coupled trade-offs between site accessibility, selective RNA unfolding and sliding at  
 258 upstream standby sites. In: *Nucleic acids research* 42 (4), S. 2646–2659. DOI: 10.1093/nar/gkt1139.

259 Salis, Howard M.; Mirsky, Ethan A.; Voigt, Christopher A. (2009): Automated design of synthetic  
 260 ribosome binding sites to control protein expression. In: *Nature biotechnology* 27 (10), S. 946–950.  
 261 DOI: 10.1038/nbt.1568.

262
